# Supplementary material for: Assembled caseins as crosslinkers for tough, adhesive and self-healing hydrogels towards flexible sensors
Source: Royal Society of Chemistry journal article supplement (doi:10.1039/d2ta03399b), 2022-01-01
Supplement: d2ta03399b1.pdf [file d2ta03399b1.pdf]

## Electronic Supplementary Information

### **Assembled Caseins as Crosslinkers for Tough, Adhesive and Self-Healing Hydrogels towards Flexible Sensor**

Xiao-Xia Li<sup>a</sup>, Min Wang<sup>a</sup>, Jing Dai<sup>b</sup>, Huanhuan Liu<sup>\*a</sup>, Haili Qin<sup>\*b</sup>

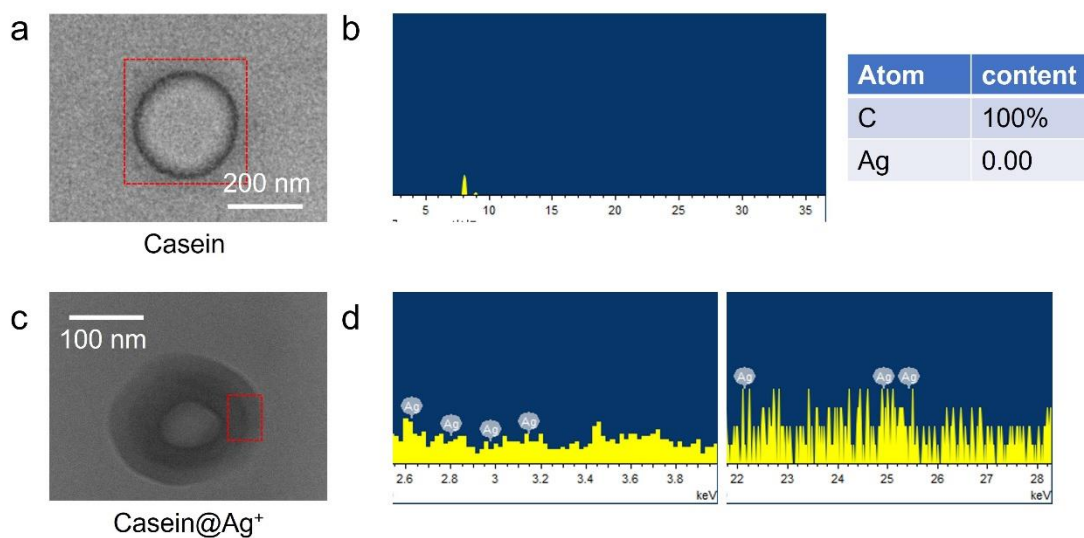

**Figure S1.** TEM image and EDS analysis of **(a, b)** Casein and **(c, d)** Casein@Ag<sup>+</sup>.

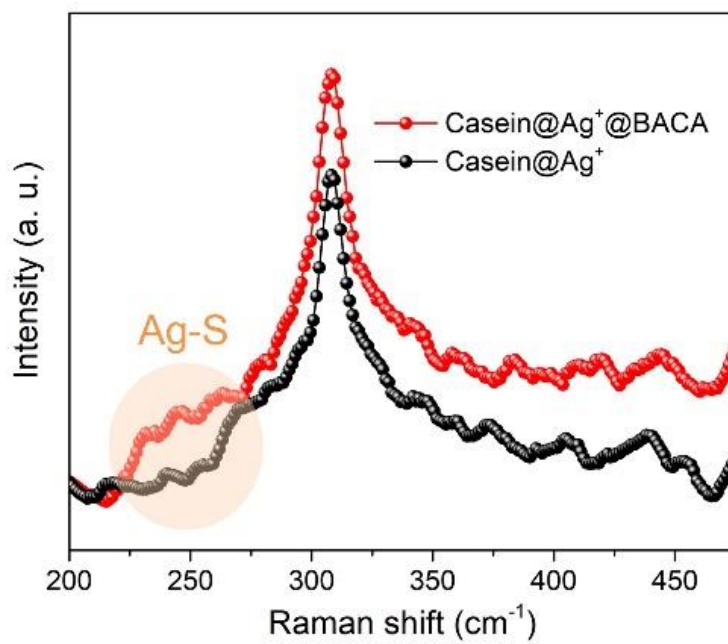

**Figure S2.** Raman spectra of Casein@Ag<sup>+</sup>@BACA and Casein@Ag<sup>+</sup>.

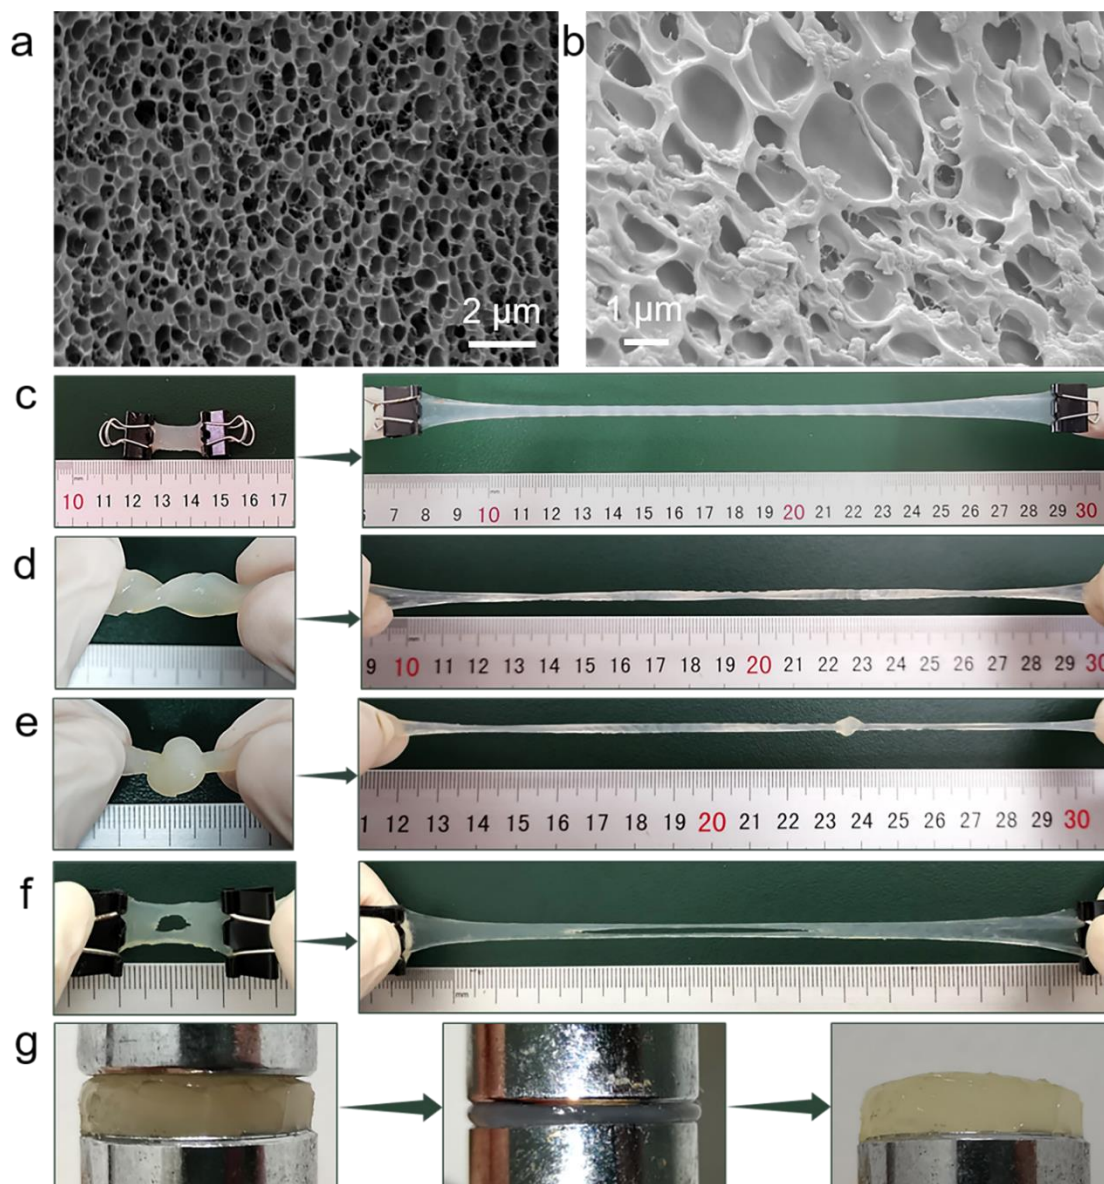

**Figure S3.** SEM images of freeze-dried (a) CAP and (b) CP hydrogels. (c) Optical images show the high stretchability of the CAP hydrogel. (d-f) Optical images show the CAP hydrogel with different types of deformations, such as twisting, knotting, punching, and extensive stretching. (g) Optical images show the excellent elastic performance to resist a high compression.

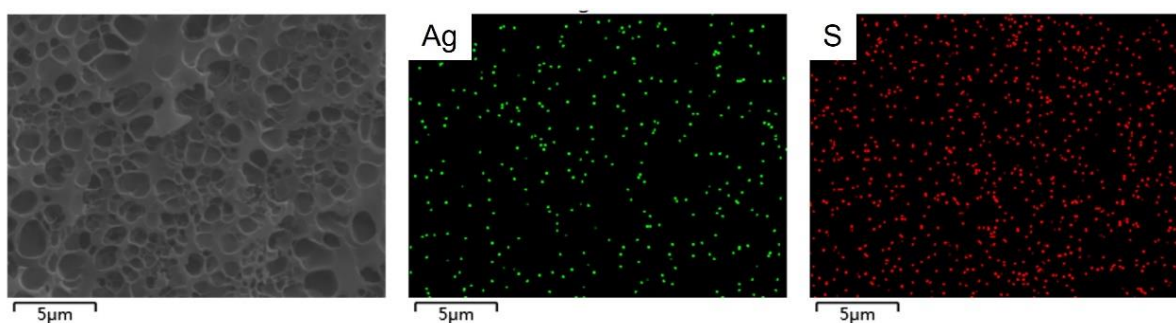

**Figure S4.** Element mappings of the freeze-dried CAP hydrogel showing the uniform dispersion of Ag and S.

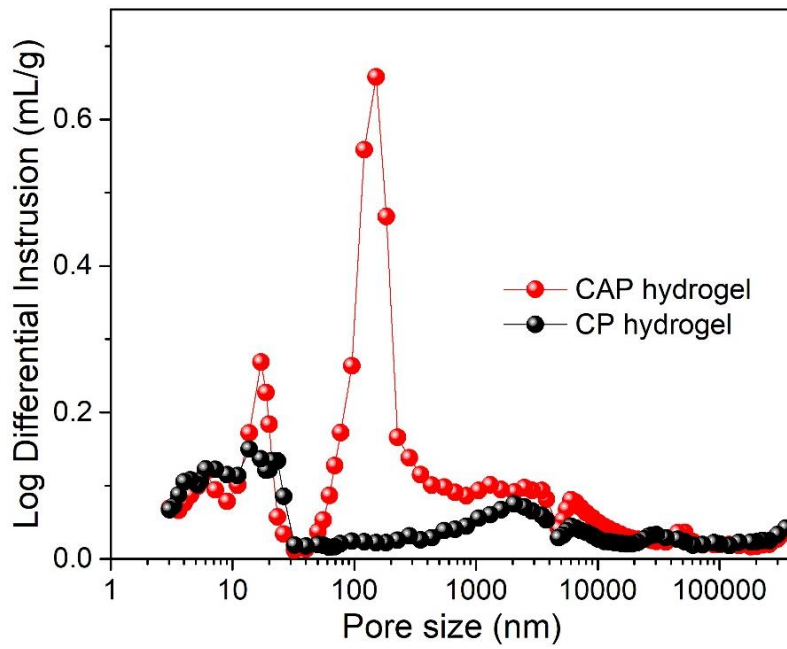

**Figure S5.** Detailed analysis of network structure for hydrogels using a mercury intrusion porosimeter.

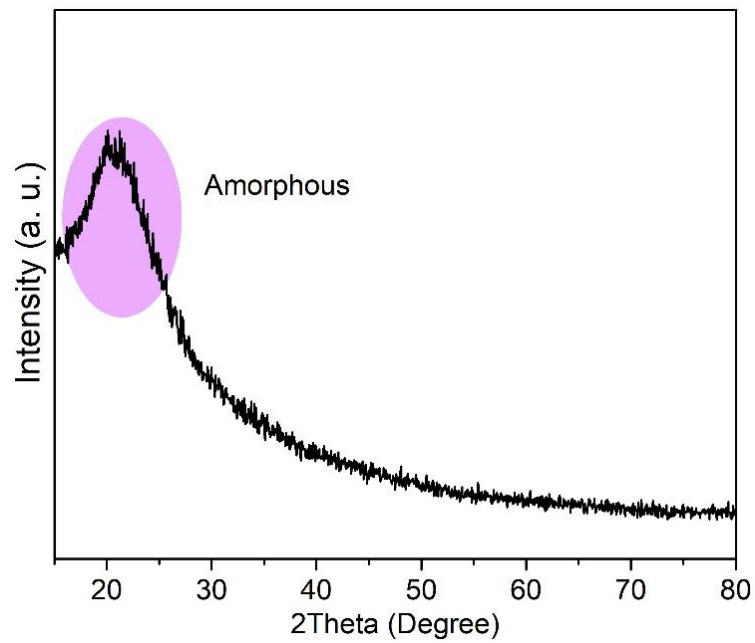

**Figure S6.** XRD pattern of CAP hydrogel. The broad peak at about 21° confirmed the amorphous nature of CAP hydrogel.

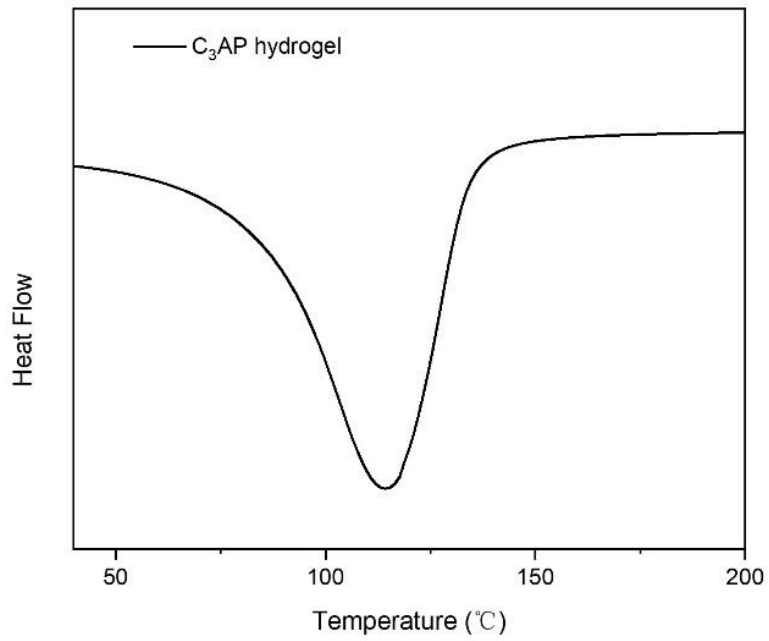

**Figure S7.** DSC thermogram of C<sub>3</sub>AP hydrogel.

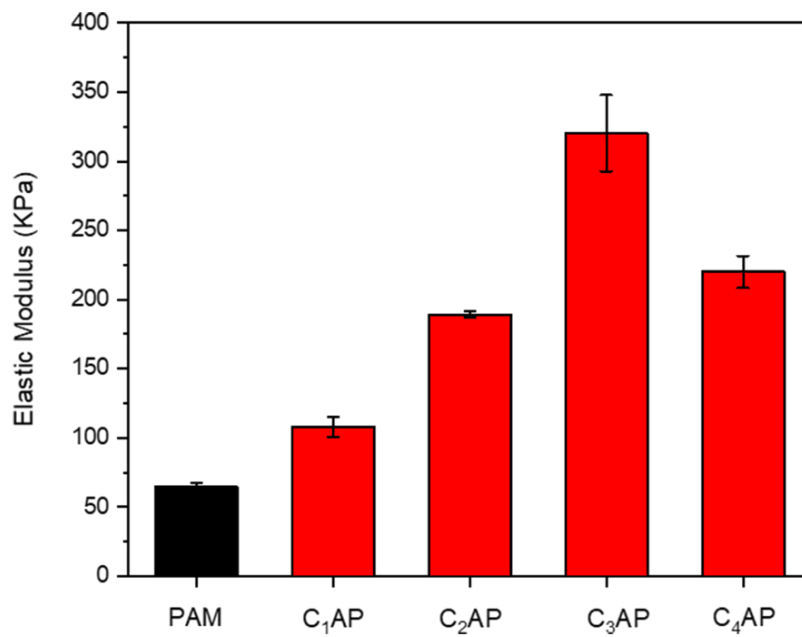

**Figure S8.** The tangle elastic modulus was calculated from the stress-strain curves of the PAM and CAP hydrogels as a function of casein concentration.

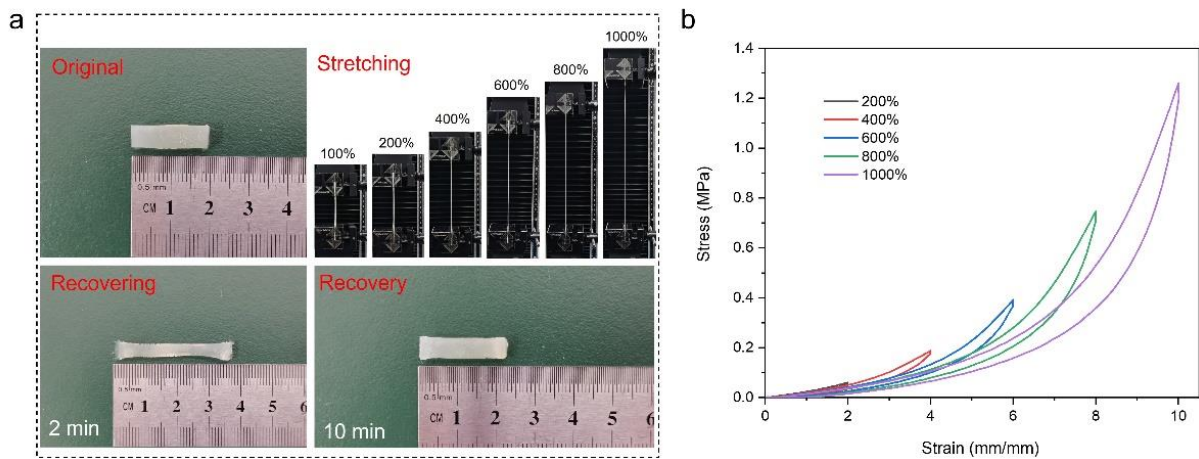

**Figure S9.** Self-recovery performance. **(a)** Optical images showing the stretching and self-recovering process of C<sub>3</sub>AP hydrogel. **(b)** Tensile stress-strain curves of C<sub>3</sub>AP hydrogel subjected to loading and unloading to measure hysteresis.

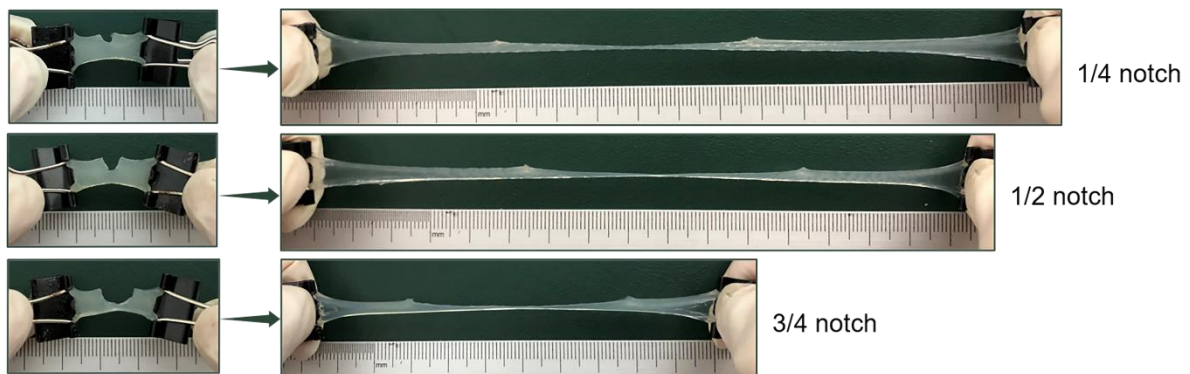

**Figure S10.** Optical images show the C<sub>3</sub>AP hydrogel pieces with notches from 1/4 to 3/4 of their original widths stretched to form large deformations without rupturing.

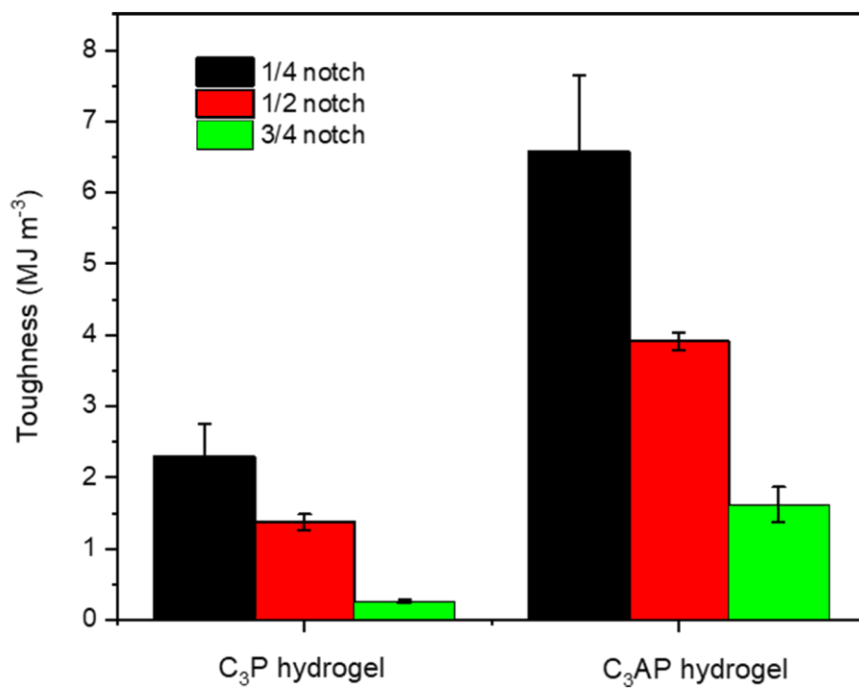

**Figure S11.** Histogram shows the toughness of the pristine C<sub>3</sub>P, C<sub>3</sub>AP hydrogels and corresponding samples with different notch proportions.

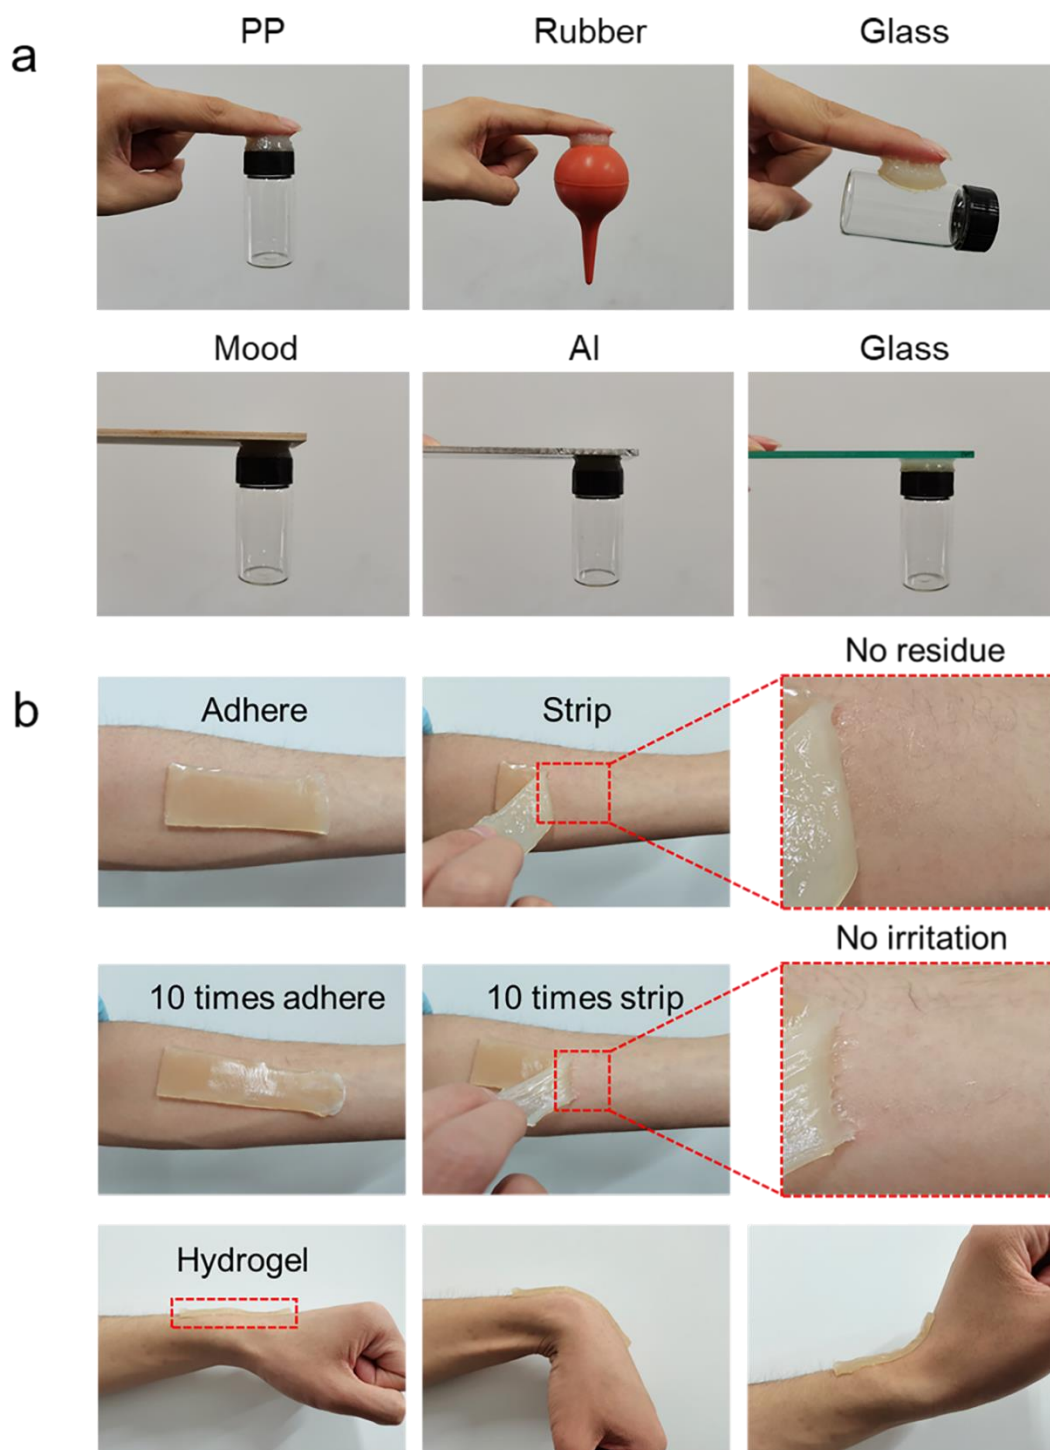

**Figure S12.** (a) The C<sub>3</sub>AP hydrogel adhered to various materials. (b) The C<sub>3</sub>AP hydrogel was repeatedly adhered to the skin of the author. After peeling off, no residue or irritation on the skin was found. Adhering to the elbow joint without limiting movement.



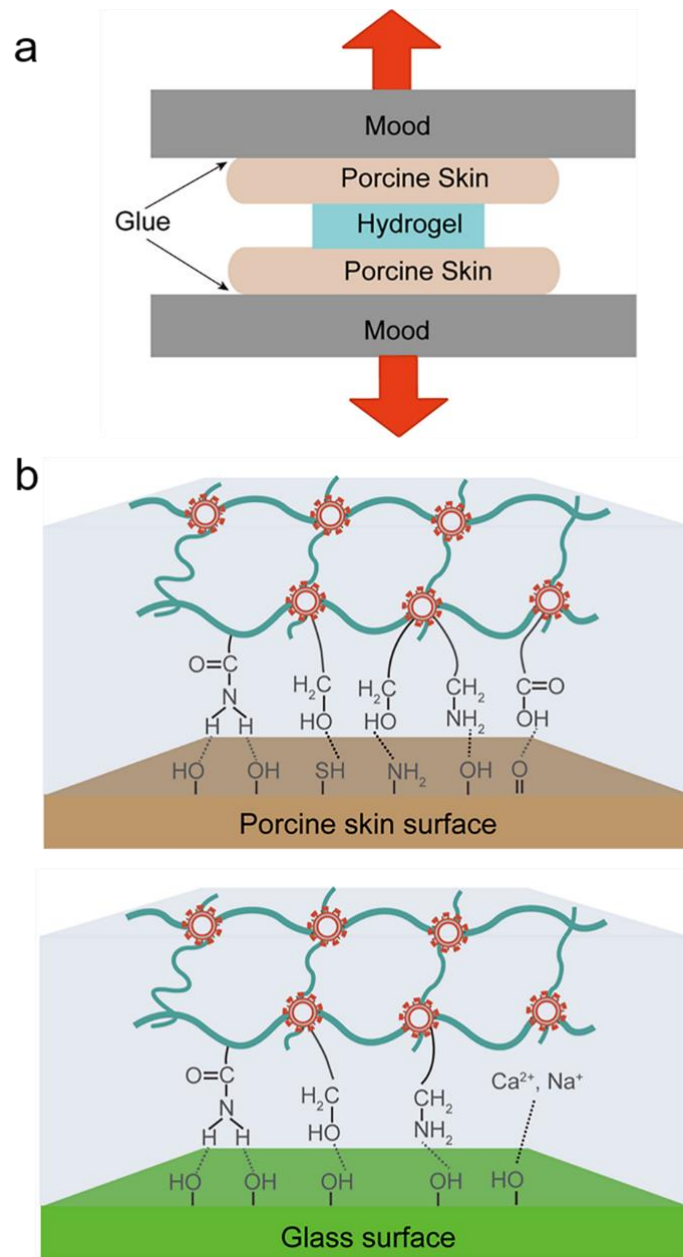

**Figure S13. (a)** Schematic graph of tensile-adhesion test of adhesive hydrogel on porcine skin tissue. **(b)** The adhesion mechanism of the CAP hydrogel.

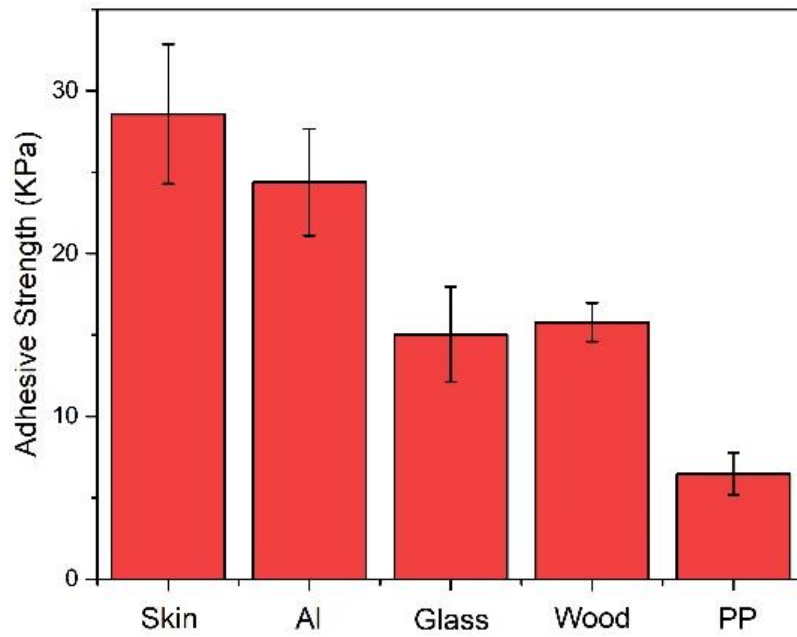

**Figure S14.** Adhesion strength of the C<sub>3</sub>AP hydrogel to different substrates. Error bars showing the SD with sample size of 6.

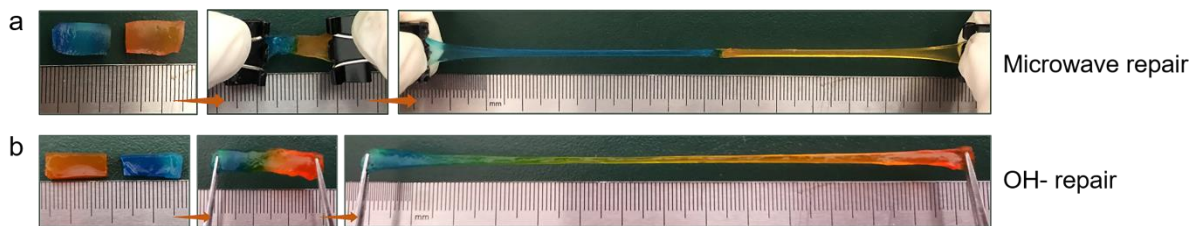

**Figure S15.** Optical images show the excellent healing ability of C<sub>3</sub>AP hydrogel under different stimuli.

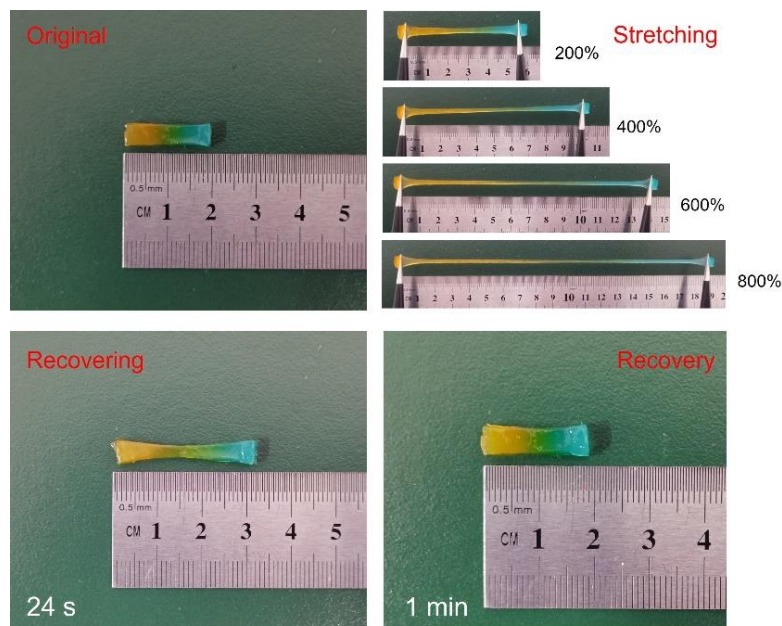

**Figure S16.** Optical images showing the excellent self-recovery performance of the healed hydrogel.

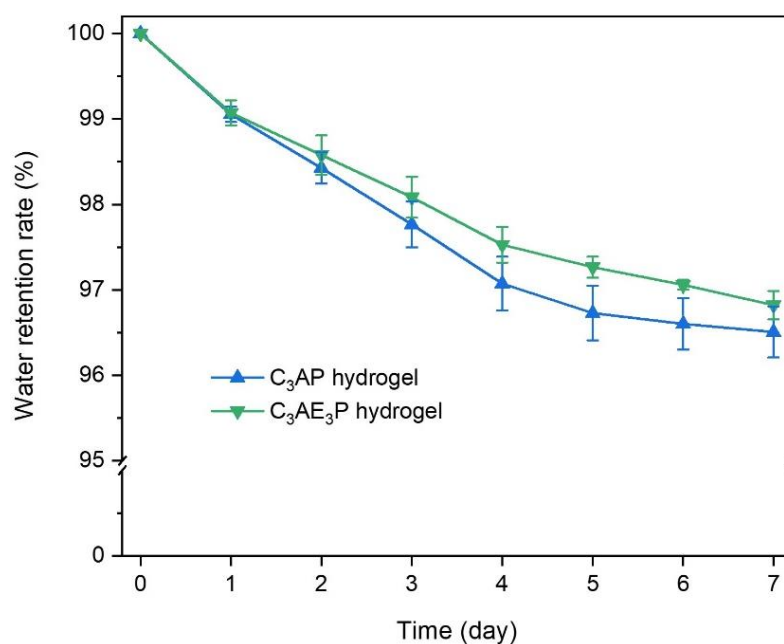

**Figure S17.** Water retention as a function of time when placing the hydrogel under the condition of room temperature. Error bars showing the SD with sample size of 6.

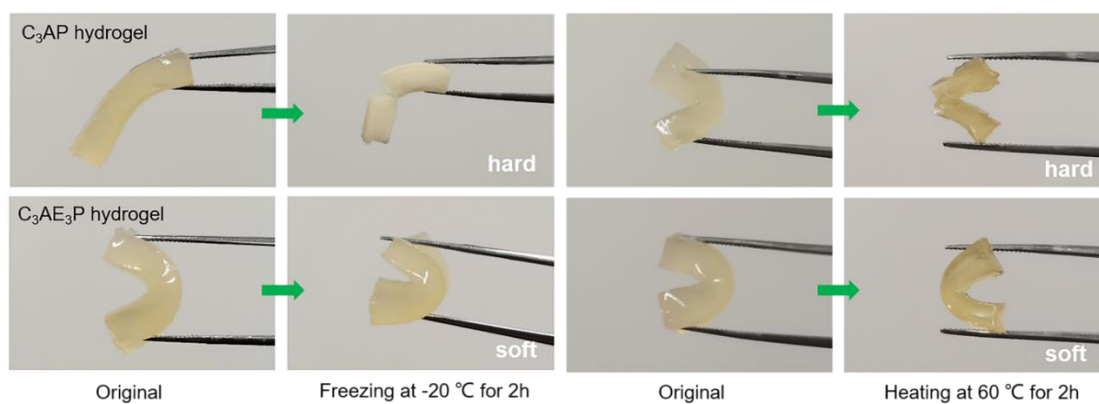

**Figure S18.** Display of the C<sub>3</sub>AP and C<sub>3</sub>AE<sub>3</sub>P hydrogels after freezing at -20 °C or heating at 60 °C.

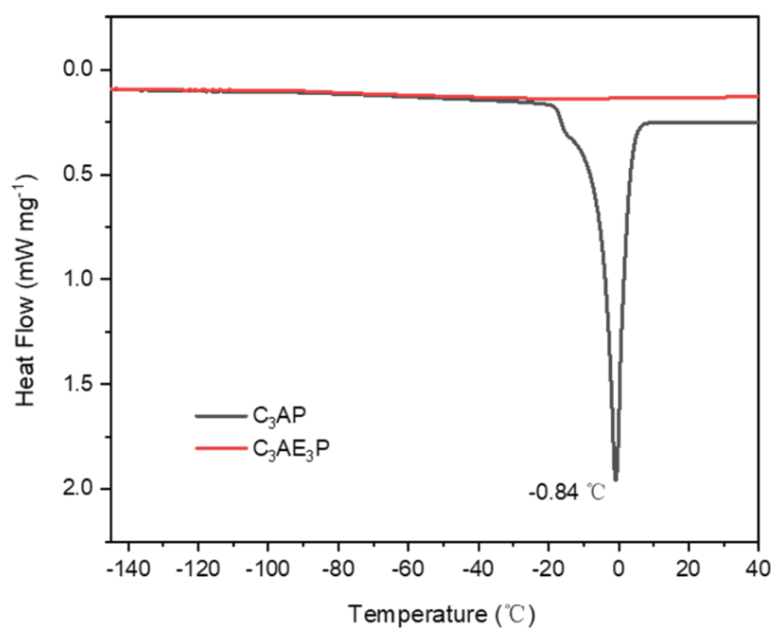

**Figure S19.** DSC thermograms of  $C_3AP$  and  $C_3AE_3P$  hydrogels from  $-145\text{ }^\circ\text{C}$ . to  $40\text{ }^\circ\text{C}$ ., the heating rate was  $5\text{ }^\circ\text{C}\cdot\text{min}^{-1}$ .

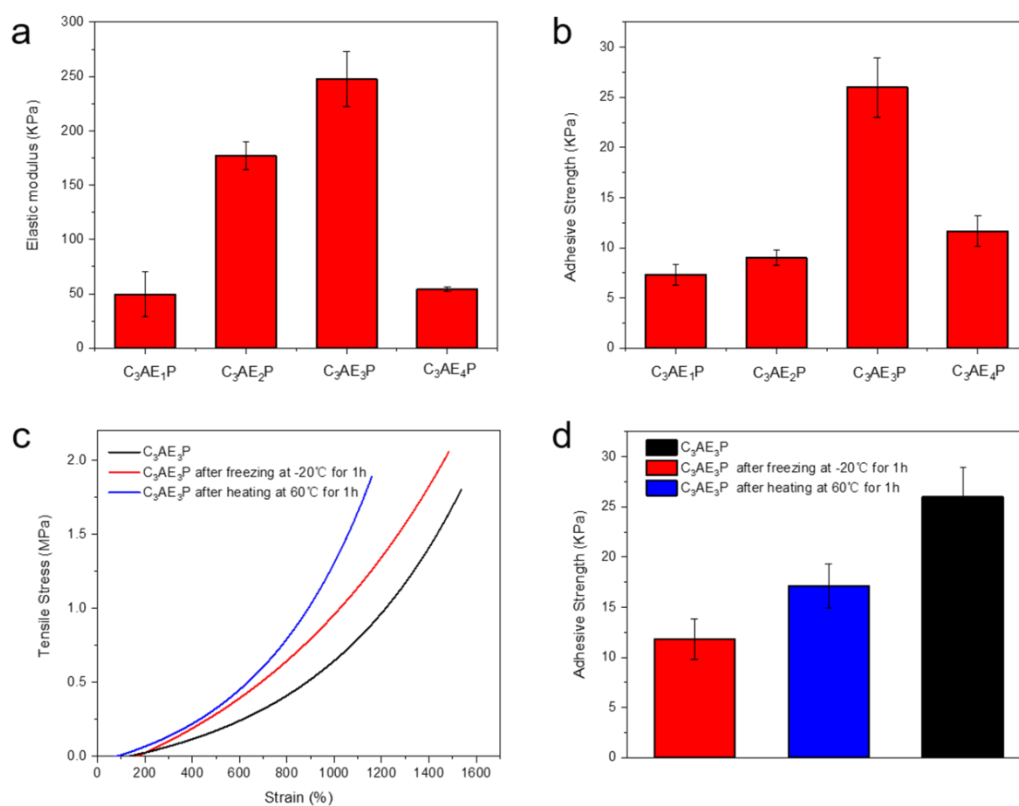

**Figure S20.** (a) The tangle elastic modulus was calculated from the stress-strain curves of the CAEP hydrogels. (b) The adhesive strength of the CAEP hydrogels. (c) Tensile stress-strain curves and (d) adhesive strength of the  $C_3AE_3P$  hydrogel under different conditions.

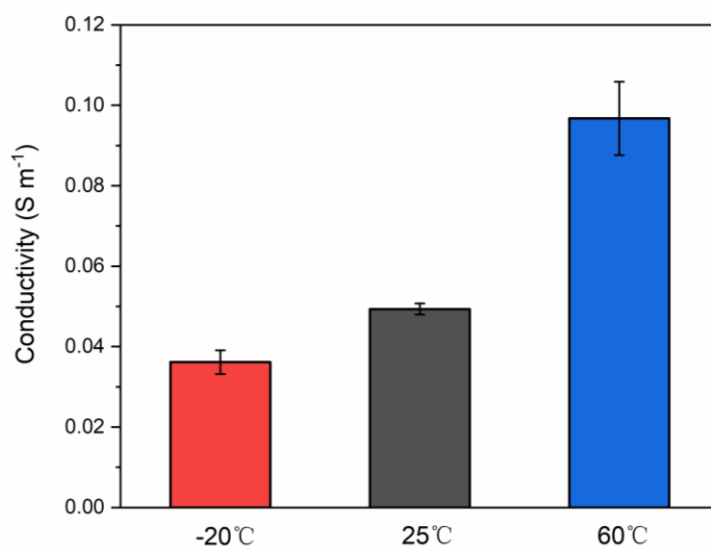

**Figure S21.** Electrical conductivity of C<sub>3</sub>AE<sub>3</sub>P hydrogel at different temperatures.

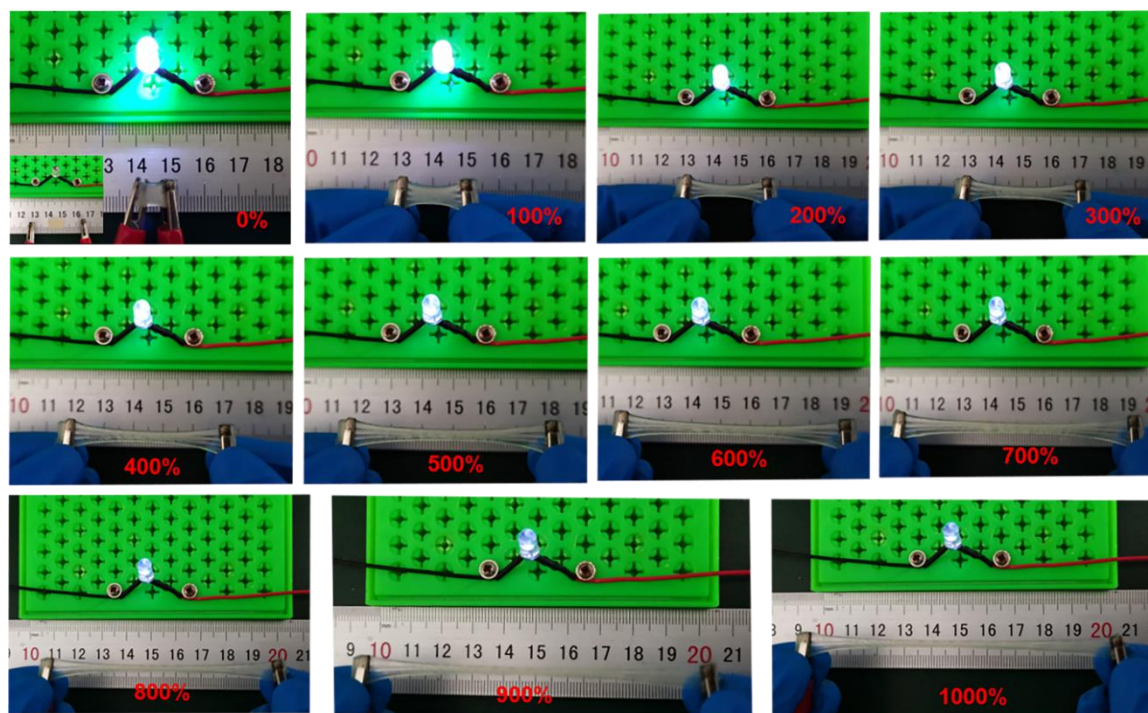

**Figure S22.** Optical images demonstrate that the C<sub>3</sub>AE<sub>3</sub>P hydrogel can be used as a conductor in circuits and the bulb became dimmed during stretching.

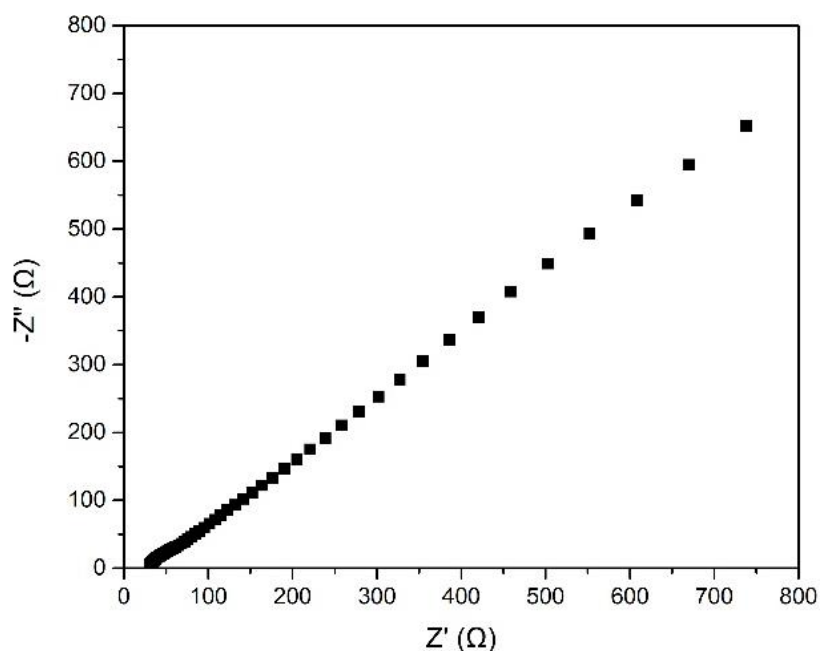

**Figure S23.** Electrochemical impedance spectra of the  $C_3AE_3P$  hydrogel.

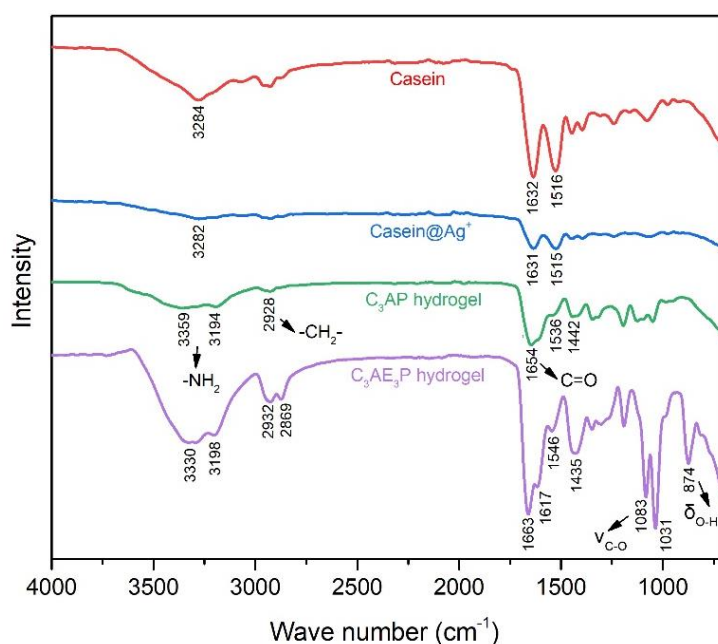

**Figure S24.** FT-IR spectra of Casein, Casein@Ag<sup>+</sup>, C<sub>3</sub>AP hydrogel and C<sub>3</sub>AE<sub>3</sub>P hydrogel. The primary characteristic peaks of casein at 3284, 1632, 1516 cm<sup>-1</sup> were amino groups, carbonyl groups, N-H bending, and C-N stretching vibration, respectively. For C<sub>3</sub>AP hydrogel, 3359 and 3194 cm<sup>-1</sup> were absorption peaks of free and associated amino groups, respectively. 2928 and 1442 cm<sup>-1</sup> were vibration peaks of methylene, and 1654 cm<sup>-1</sup> was the absorption peak of carbonyl groups. For C<sub>3</sub>AE<sub>3</sub>P hydrogel, the characteristic peaks of EG at 1083, 1031, and 874 cm<sup>-1</sup> were C-O stretching vibration and O-H bending vibration, respectively. The shifting of stretching vibration of O-H from 3359 to 3330 cm<sup>-1</sup> indicates the formation of hydrogen bonding between water and EG molecules.

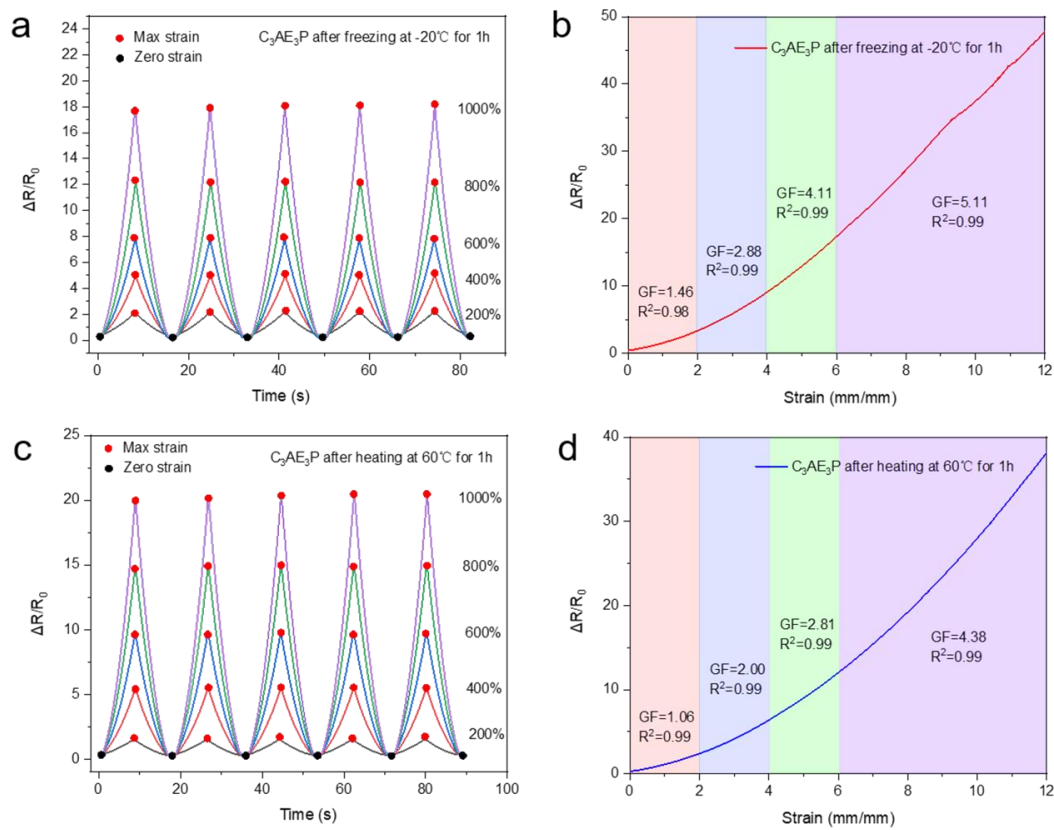

**Figure S25.** (a, c) Variation in the relative electrical resistance of  $C_3AE_3P$  hydrogel under different conditions during 5 stretching-releasing cycles with the fixed strains of 200, 400, 600, 800, and 1000%, respectively. (b, d) The tensile conductivity curves of  $C_3AE_3P$  hydrogel under different conditions.

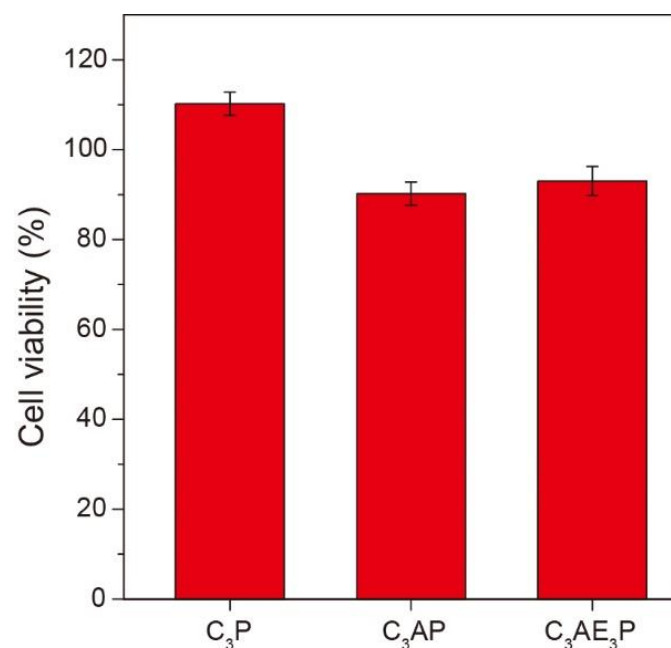

**Figure S26.** Cell cytotoxicity study of hydrogels. Error bars showing the SD with sample size of 6.

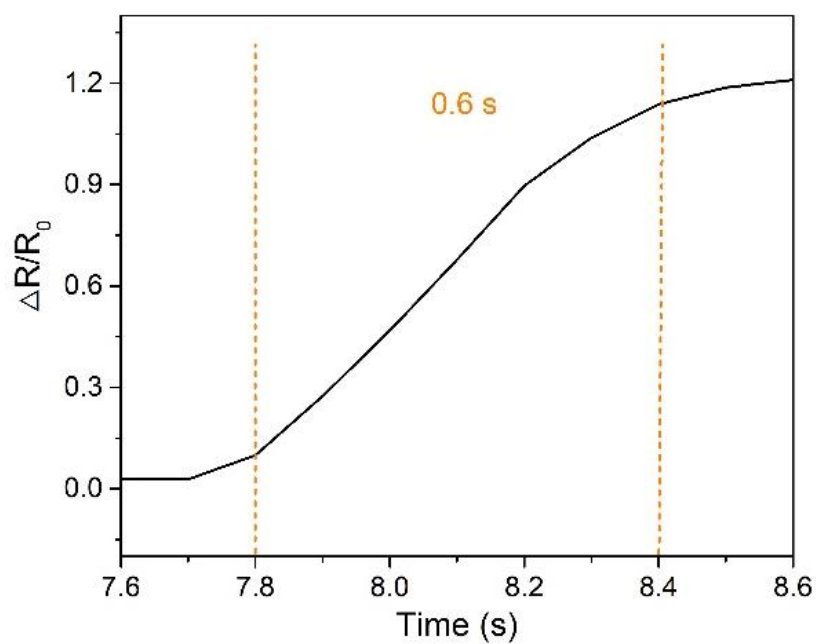

**Figure S27.** Response rate of the C<sub>3</sub>AE<sub>3</sub>P hydrogel.

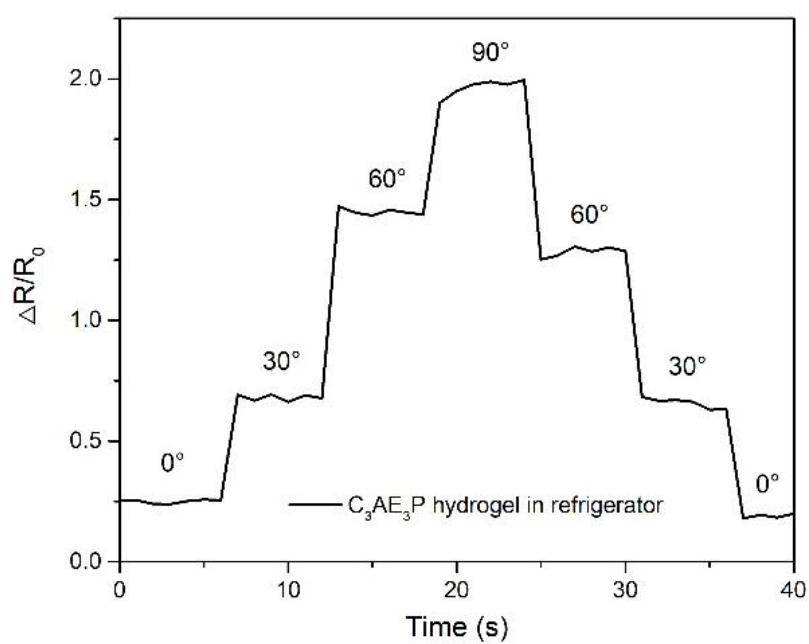

**Figure S28.** Sensing performance of C<sub>3</sub>AE<sub>3</sub>P hydrogel recorded in refrigerator at -20 °C.



**Table S1.** Contents of the various hydrogels.

| <b>Hydrogel</b>                  | <b>Casein<br/>(wt%)</b> | <b>Ag<sup>+</sup><br/>(mg)</b> | <b>V<sub>EG</sub>/V<sub>NaOH</sub><br/>solution</b> | <b>BACA<br/>(mg)</b> | <b>MBA<br/>(mg)</b> | <b>AM<br/>(g)</b> | <b>Irgacure<br/>2959<br/>(mg)</b> |
|----------------------------------|-------------------------|--------------------------------|-----------------------------------------------------|----------------------|---------------------|-------------------|-----------------------------------|
| PAM                              | 0                       | 0                              | 0                                                   | 0                    | 2.0                 | 1.0               | 3.0                               |
| C <sub>3</sub> P                 | 15                      | 0                              | 0                                                   | 0                    | 2.0                 | 1.0               | 3.0                               |
| C <sub>1</sub> AP                | 5                       | 0.05                           | 0                                                   | 2.0                  | 0                   | 1.0               | 3.0                               |
| C <sub>2</sub> AP                | 10                      | 0.05                           | 0                                                   | 2.0                  | 0                   | 1.0               | 3.0                               |
| C <sub>3</sub> AP                | 15                      | 0.05                           | 0                                                   | 2.0                  | 0                   | 1.0               | 3.0                               |
| C <sub>4</sub> AP                | 20                      | 0.05                           | 0                                                   | 2.0                  | 0                   | 1.0               | 3.0                               |
| C <sub>3</sub> AE <sub>1</sub> P | 15                      | 0.05                           | 1/2                                                 | 2.0                  | 0                   | 1.0               | 3.0                               |
| C <sub>3</sub> AE <sub>2</sub> P | 15                      | 0.05                           | 1/4                                                 | 2.0                  | 0                   | 1.0               | 3.0                               |
| C <sub>3</sub> AE <sub>3</sub> P | 15                      | 0.05                           | 1/6                                                 | 2.0                  | 0                   | 1.0               | 3.0                               |
| C <sub>3</sub> AE <sub>4</sub> P | 15                      | 0.05                           | 1/8                                                 | 2.0                  | 0                   | 1.0               | 3.0                               |
